# Supplementary material for: Indocyanine Green-Loaded Liposomes-Assisted Photoacoustic Computed Tomography for Evaluating In Vivo Tumor Penetration of Liposomal Nanocarriers
Source: MDPI journal article supplement (doi:10.3390/mi15010090), 2023-12-30
Supplement: s1 [file s1]

## Supplementary Materials

# Indocyanine Green-Loaded Liposomes-Assisted Photoacoustic Computed Tomography for Evaluating In Vivo Penetration Ability of Liposomal Nanocarriers

*Chenjun Wu,<sup>1,2</sup> Qi Sun,<sup>1</sup> Xiangdong Liu,<sup>1</sup> Xin Sun,<sup>\*3</sup> Zeyu Chen,<sup>1</sup> and Han Shan<sup>\*1</sup>*

<sup>1</sup>State Key Laboratory of Precision Manufacturing for Extreme Service Performance, College of Mechanical and Electrical Engineering, Central South University, Changsha 410083, China

<sup>2</sup>Changjun Riverside Middle School, Changsha 410023, China

<sup>3</sup>Department of Biomedical Engineering, University of Southern California, Los Angeles, CA 90089, USA

\*Corresponding authors: Han Shan (hanshancsu@126.com)

Xin Sun (xsun7861@usc.edu)

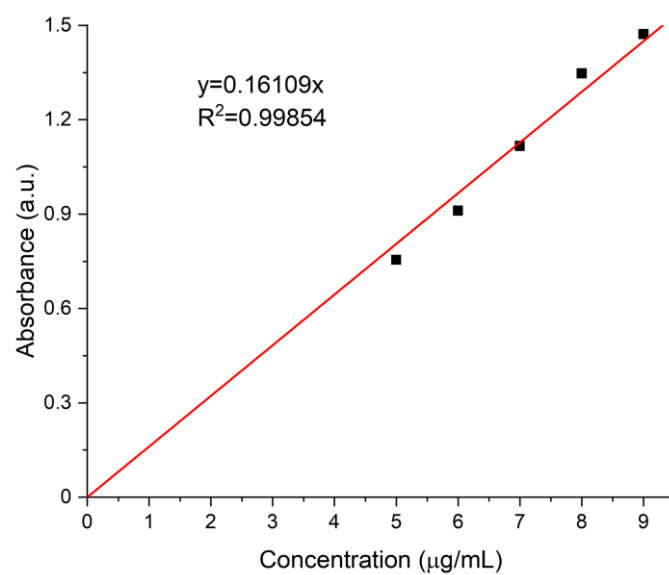

**Figure S1.** Calibration curve obtained by measuring the absorbance values at 780 nm of samples containing increasing ICG concentrations.

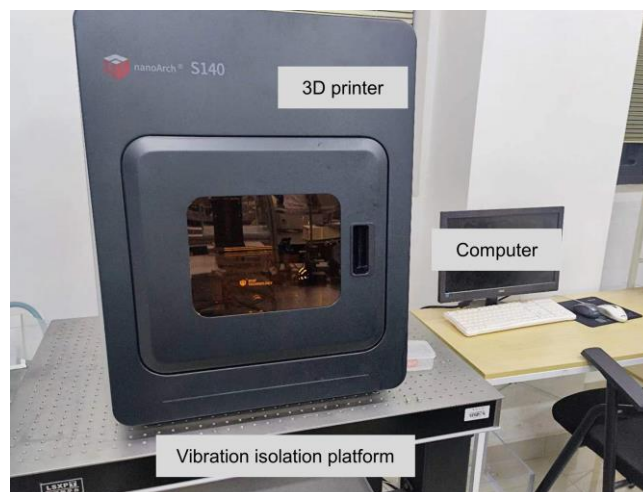

**Figure S2.** The photograph of the P $\mu$ SL 3D printer.

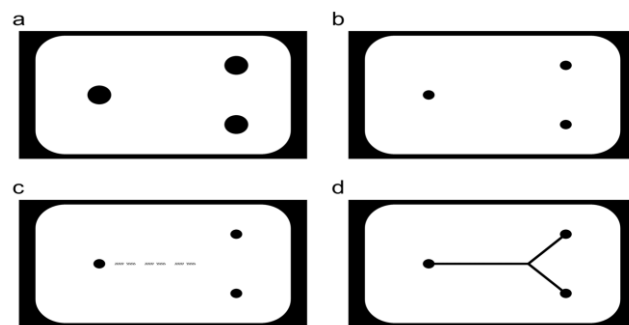

**Figure S3.** Cross-sectional images of the 3D model.

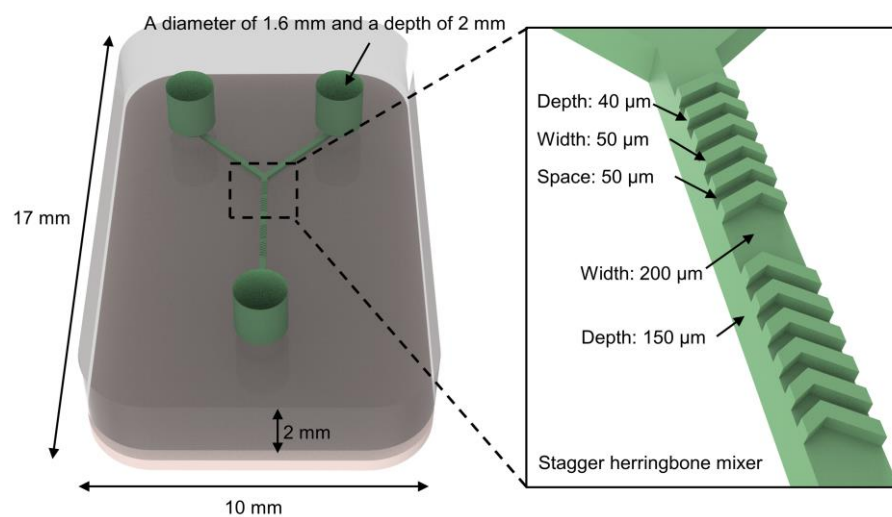

**Figure S4.** Detailed parameters of the microfluidic mixer.

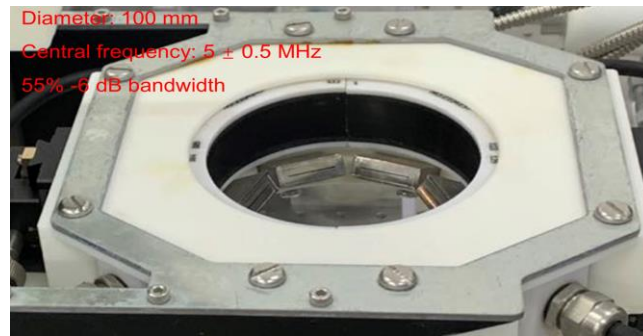

**Figure S5.** Detailed parameters of the ring-array transducer.
